# Supplementary material for: Structural inhibition of dynamin-mediated membrane fission by endophilin
Source: eLife journal article supplement (doi:10.7554/elife.26856), 2017-09-21
Supplement: supp [file elife_poa_e26856_Figure3_Figure_Supplement_1.docx]

**Figure 3-Figure Supplement 2: Data collection parameters**

**Dataset Endophilin Dynamin GMPPCP Co-complex GDP**

**Microscope** TF30 Polara TF30 Polara TF30 Polara

**Detector** K2 Summit K2 Summit K2 Summit

**Collection Software** UCSFimage4 SerialEM SerialEM

**Pixel Size (Å/pixel)** 1.2156 2.49 1.2156

**Exposure Time (sec)** 6.0 8.0 8.0

**Total Dose (e-/Å2)** 40 20 40

**Micrographs** 204 2006 1660

**Motion Correction** MotionCorr MotionCor2 MotionCor2

**Defocus Range (μm)** 0.6 – 2.6 0.3 – 5.0 0.8 -2.8

**Particles contributing** 2,047 2,766 19,662

**to class averages in Fig. 3**
