# Supplementary material for: Structural inhibition of dynamin-mediated membrane fission by endophilin
Source: eLife journal article supplement (doi:10.7554/elife.26856), 2017-09-21
Supplement: supp [file elife_poa_e26856_Figure3_Figure_Supplement_2.docx]

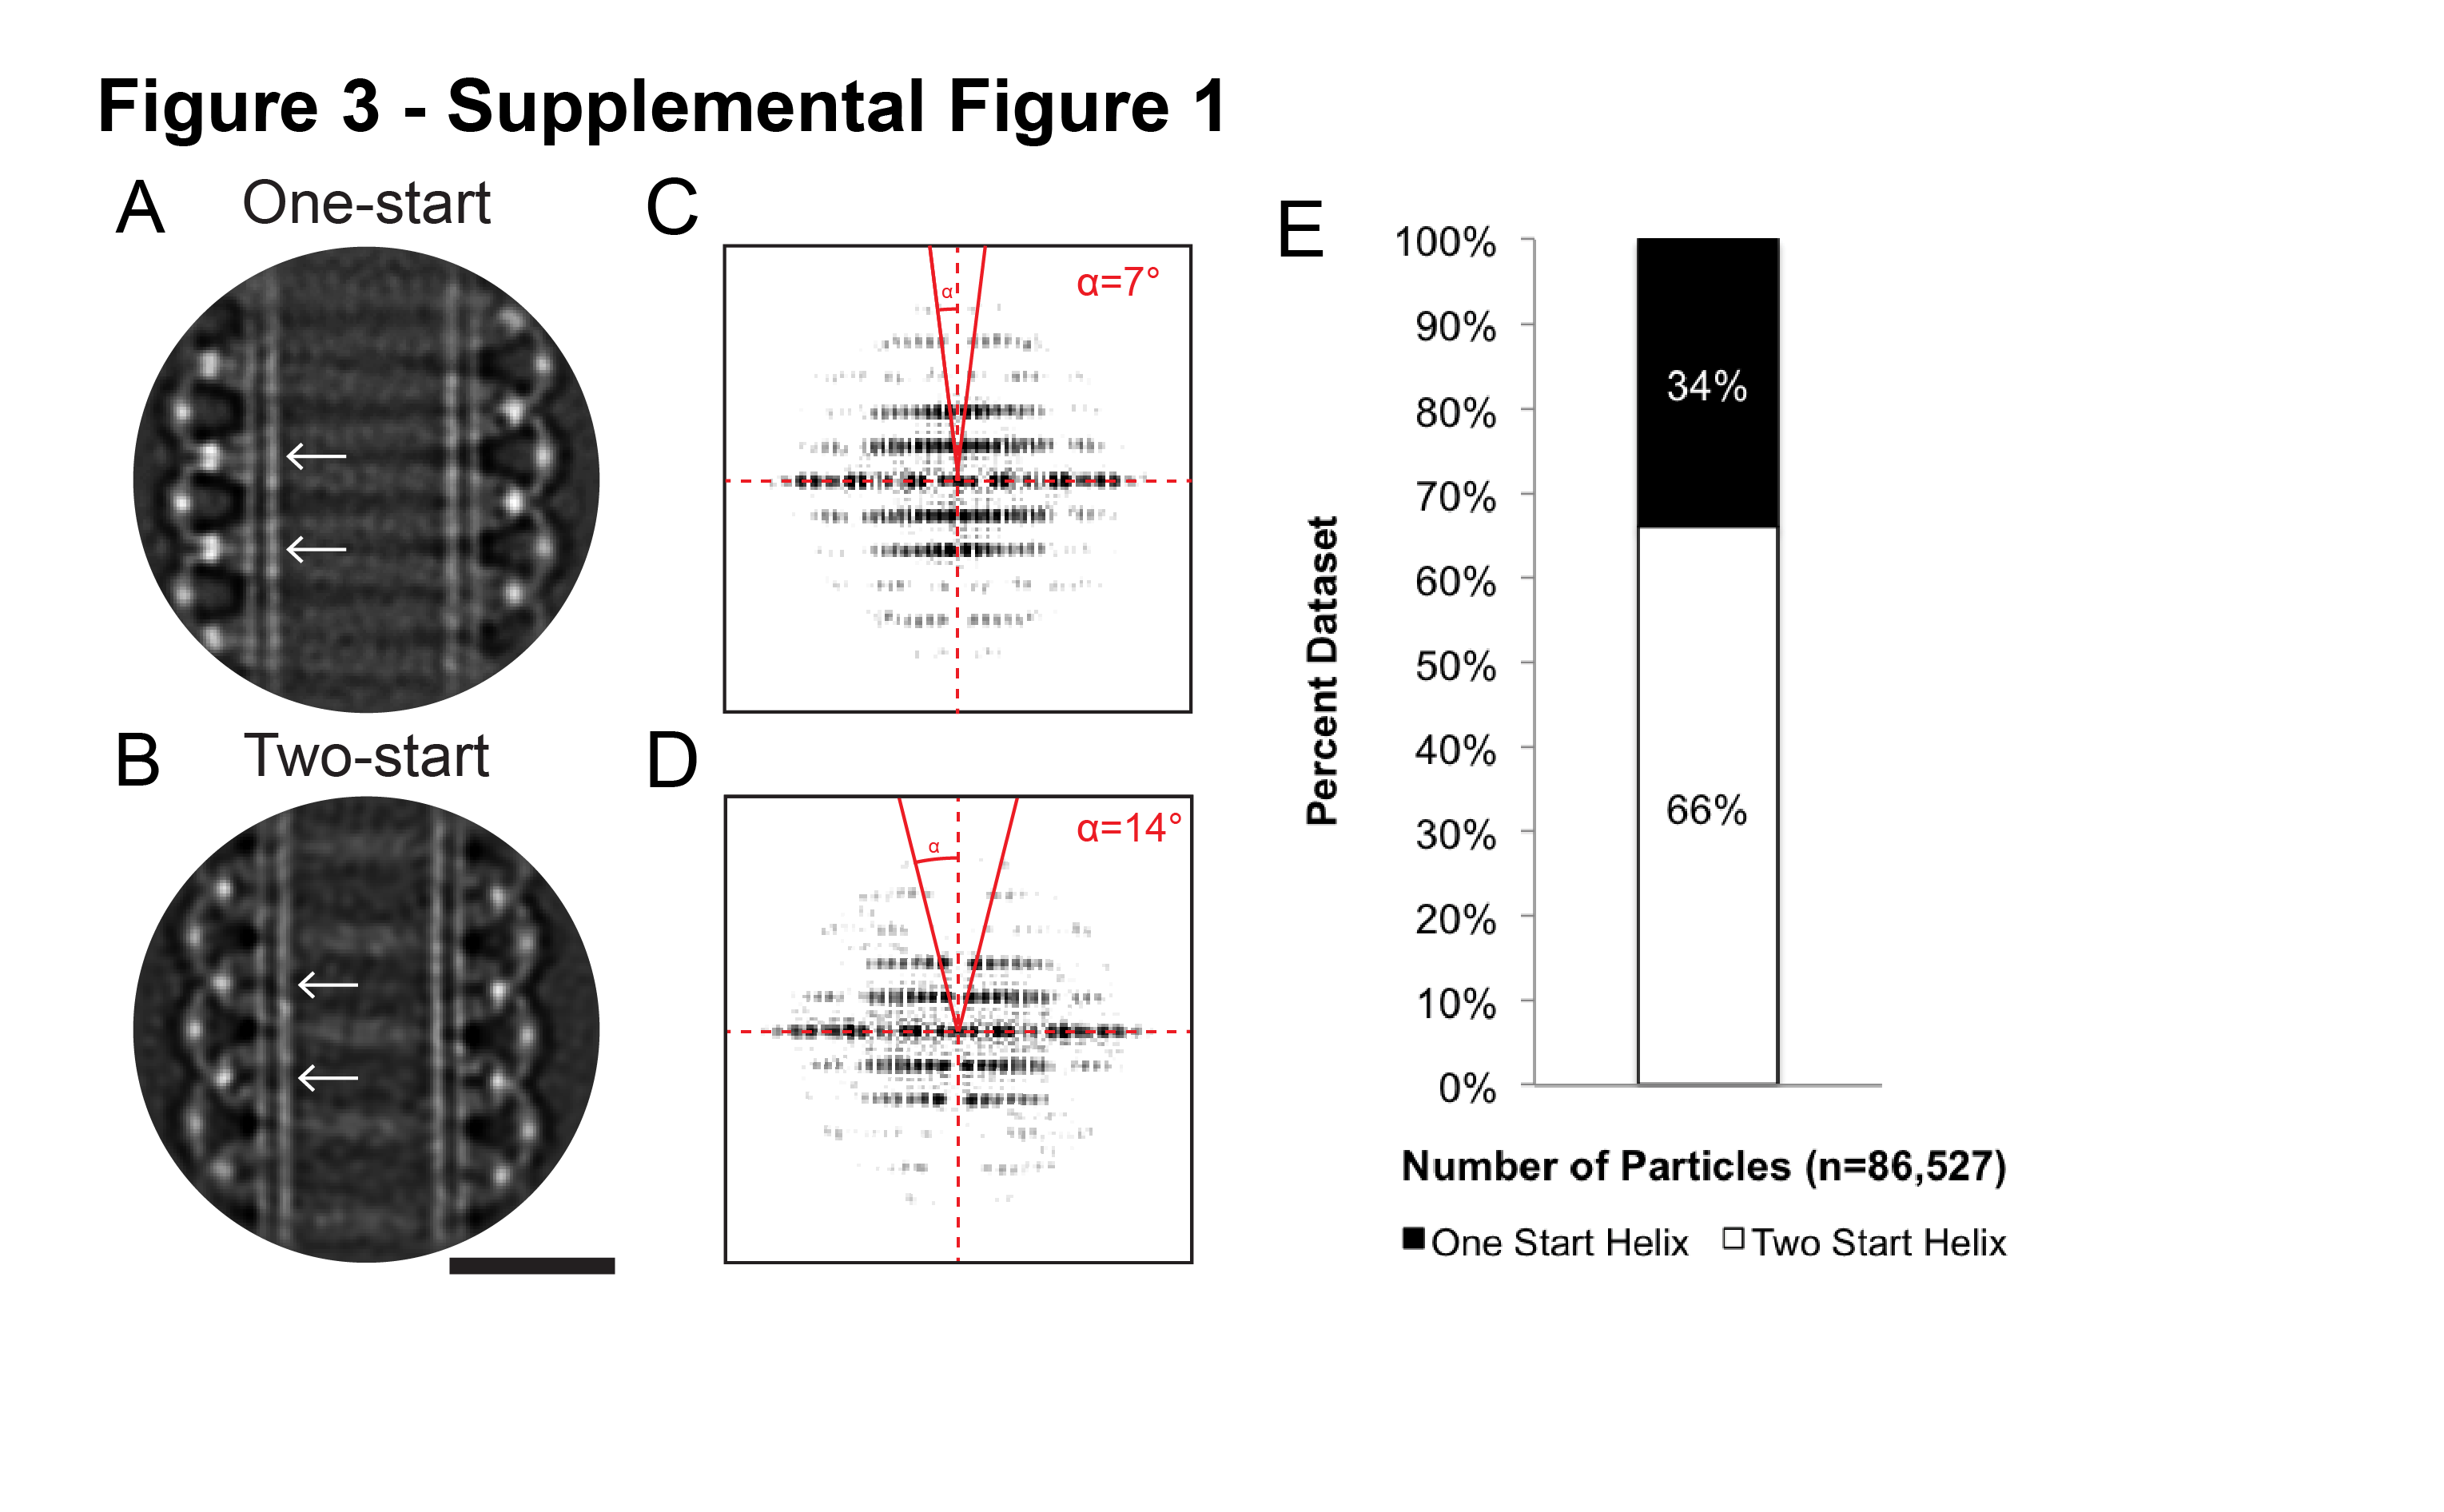


**Figure 3-Figure Supplement 1: 1-start and 2-start helices formed by Dynamin-1 with the non-hydrolyzable GTP analog GMPPCP**

**(A**) CryoEM 2D class average of a dynamin one-start helix, versus (**B**) a two-start start helix assembled around lipid tubules and in presence of GMPPCP. Stalk to stalk distances were ~13.9 nm and ~14.0 nm for the one-start and two-start dynamin helices respectively (distances between white arrows in A and B). (**C**) Power spectrum of 2D class average of the dynamin one-start helix in A, versus (**D**) for the dynamin two-start helix in B. The solid red lines and angle α highlight the doubling of the pitch between A and B, according to d = p*cos(α) where p is the pitch, d is the perpendicular separation between diffraction planes, and α is the angle shown in C and D. (**E**) Percentages of all raw particles within that classified as one-start versus two-start helices. Bar, 25 nm.
