# Supplementary material for: Structural inhibition of dynamin-mediated membrane fission by endophilin
Source: eLife journal article supplement (doi:10.7554/elife.26856), 2017-09-21
Supplement: supp [file elife_poa_e26856_Figure_1_Figure_Supplement_1.pdf › elife_poa_e26856_Figure_1_Figure_Supplement_1.pdf]

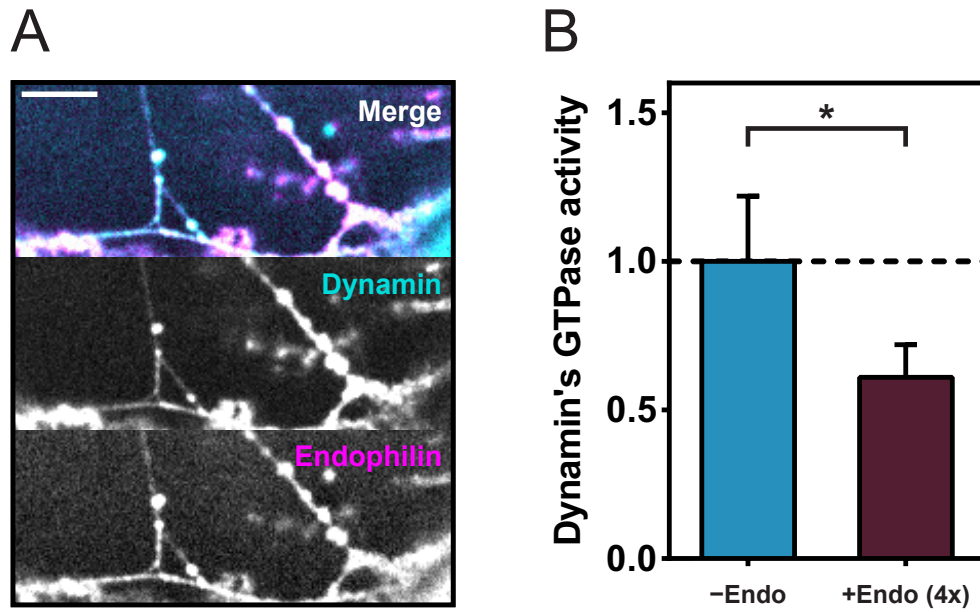

**Figure 1-Figure Supplement 1: Colocalization of dynamin and endophilin and GTPase assay.**

**(A)** Colocalisation of endophilin ATTO 565 and dynamin ATTO 488 on tubules generated from membrane sheets. Bar, 5 microns **(B)** Malachite green GTPase assay, values are normalized to the positive control (dynamin+liposomes, see methods).
