# Supplementary material for: Structural inhibition of dynamin-mediated membrane fission by endophilin
Source: eLife journal article supplement (doi:10.7554/elife.26856), 2017-09-21
Supplement: supp [file elife_poa_e26856_Figure_2_Figure_Supplement_1.docx]

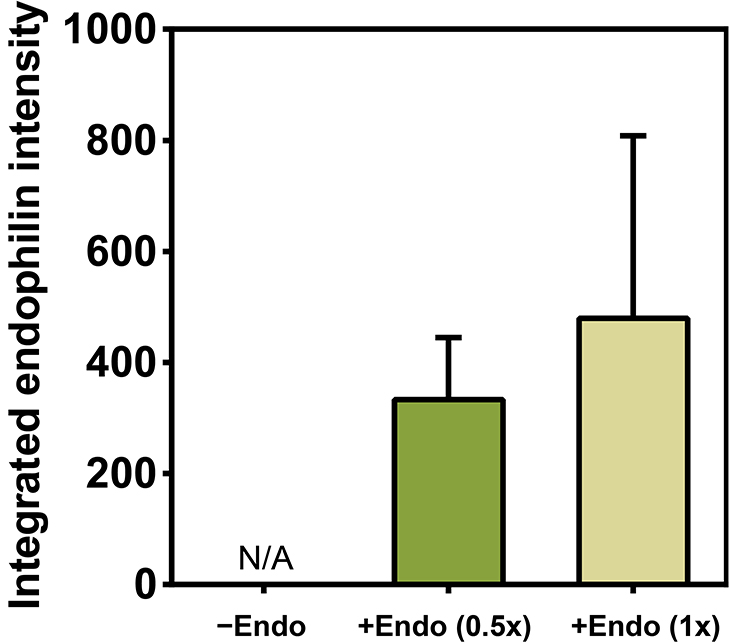


**Figure 2-Figure Supplement 1: Endophilin intensity on tube increases with increased endophilin concentration in solution.**

Quantification of endophilin signal intensity on the same tubes as those whose dynamin signal was measured for Fig. 2K. The indicated values are raw integrals of the fluorescence peaks obtained by image analysis as shown in Fig. 2M. n(−Endo) = 10, n(+Endo 0.5x) = 11, n(+Endo 1x) = 14. Source data are available in the Figure 2-Figure Supplement 1-Source Data 1.
